# Supplementary material for: High mutation load, immune-activated microenvironment, favorable outcome, and better immunotherapeutic efficacy in melanoma patients harboring MUC16/CA125 mutations
Source: Aging (Albany NY). 2020 Jun 3;12(11):10827–43. doi: 10.18632/aging.103296 (PMC7346065; doi:10.18632/aging.103296)
Supplement: Supplementary Figures [file aging-12-103296-s002..pdf]

SUPPLEMENTARY FIGURES

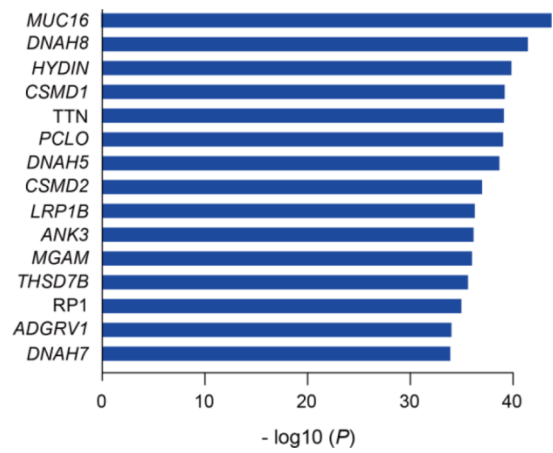

Supplementary Figure 1. The top 15 significant association of single gene mutation with mutation load in TCGA cohort.

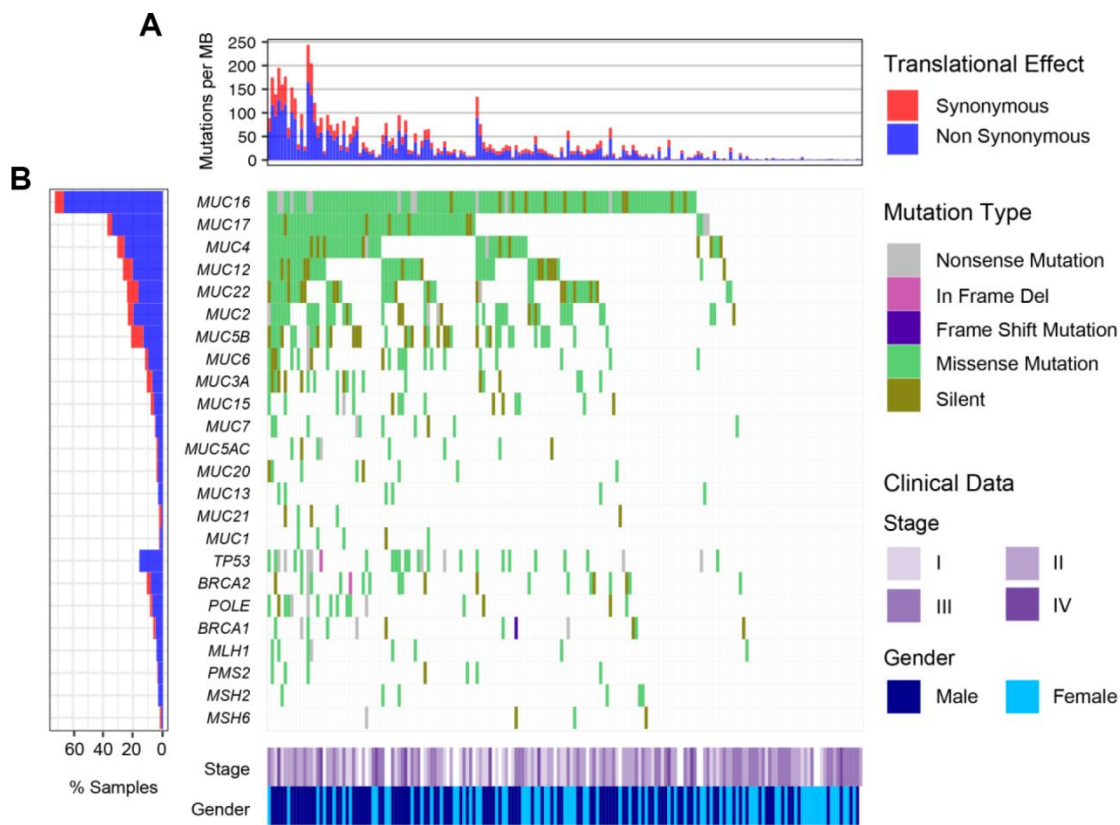

Supplementary Figure 2. Mutational patterns of *MUC16* and mucin family members in relation to DNA repair-related genes in ICGC cohort. (A) Numbers of mutations per megabase in each sample. (B) Representation for mutation patterns of mucin and DNA repair genes.

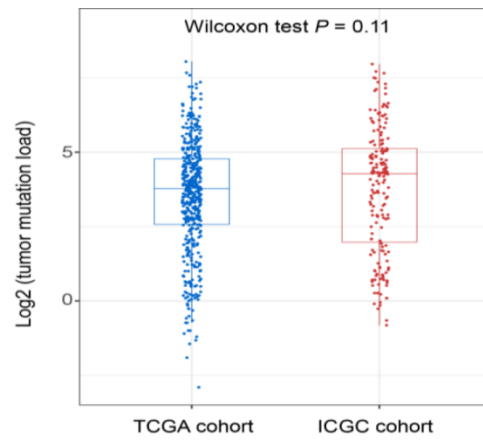

Supplementary Figure 3. Comparison of TML between TCGA and ICGC cohorts.

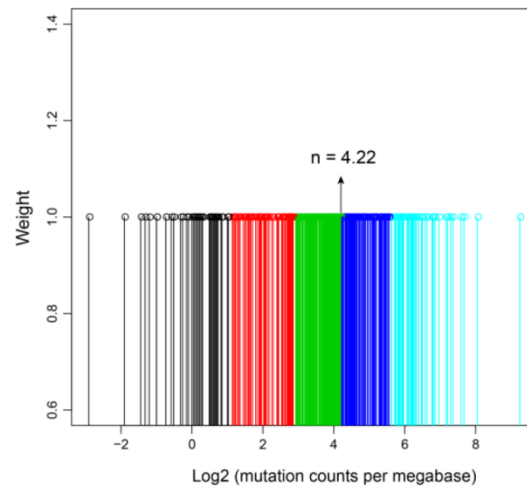

Supplementary Figure 4. Univariate k-means clustering of TML.

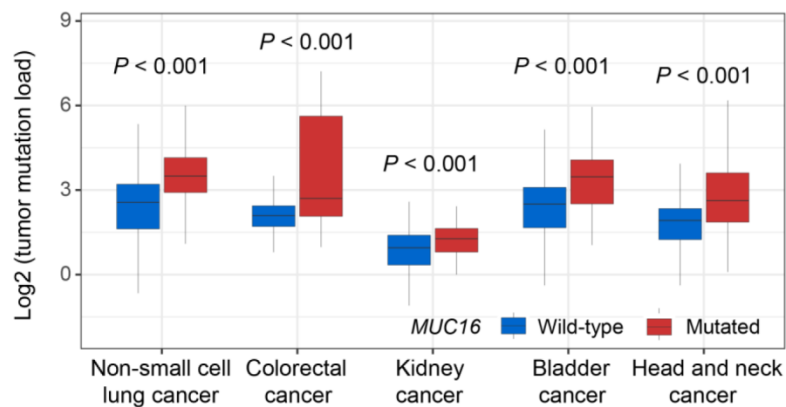

Supplementary Figure 5. Differences of TML in patients with and without *MUC16* mutations in other 5 immunotherapy susceptible cancers in TCGA.

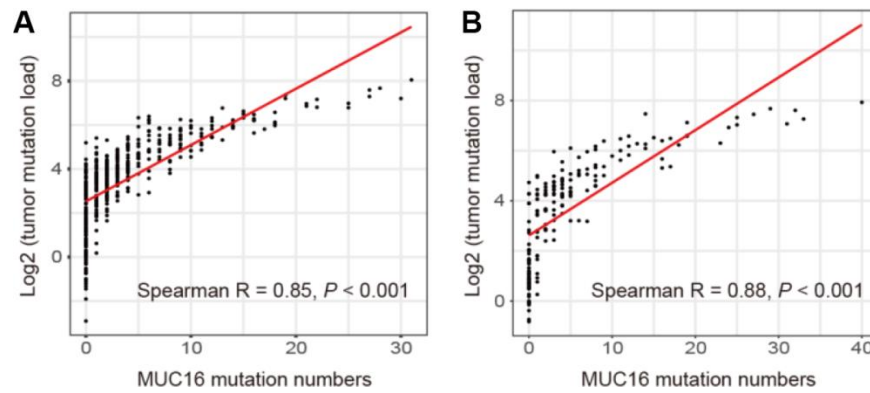

Supplementary Figure 6. Association of *MUC16* mutation numbers with TML in 2 melanoma cohorts (left: TCGA; right: ICGC).

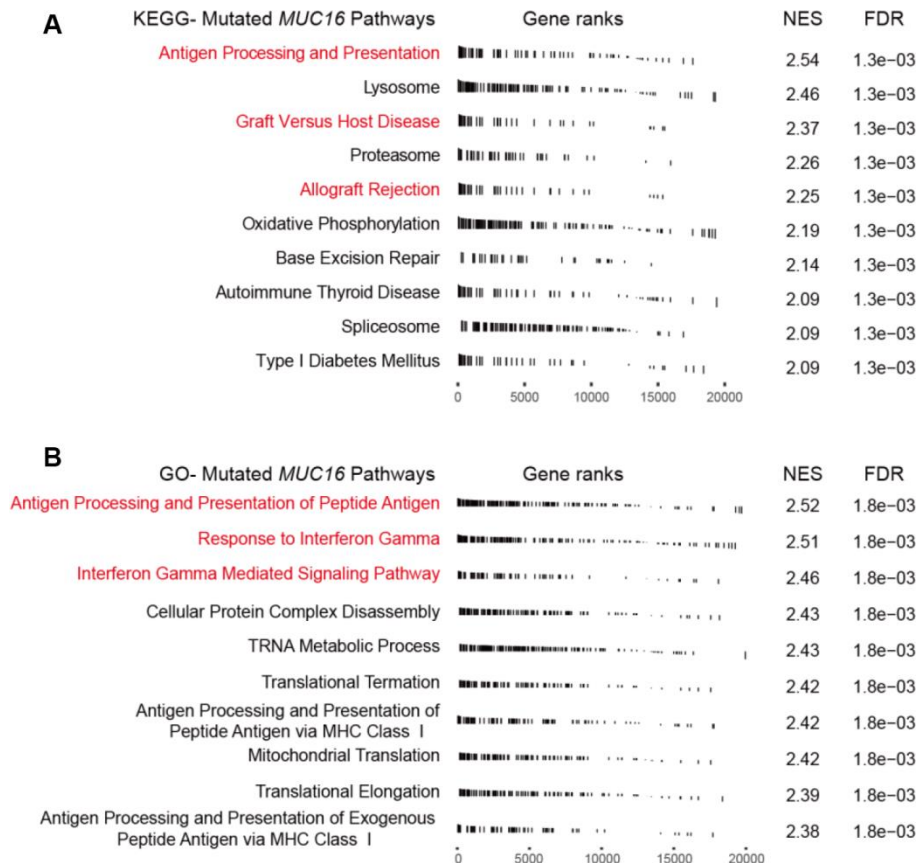

Supplementary Figure 7. Top enriched pathways of patients with *MUC16* mutations in (A) KEGG and (B) GO.

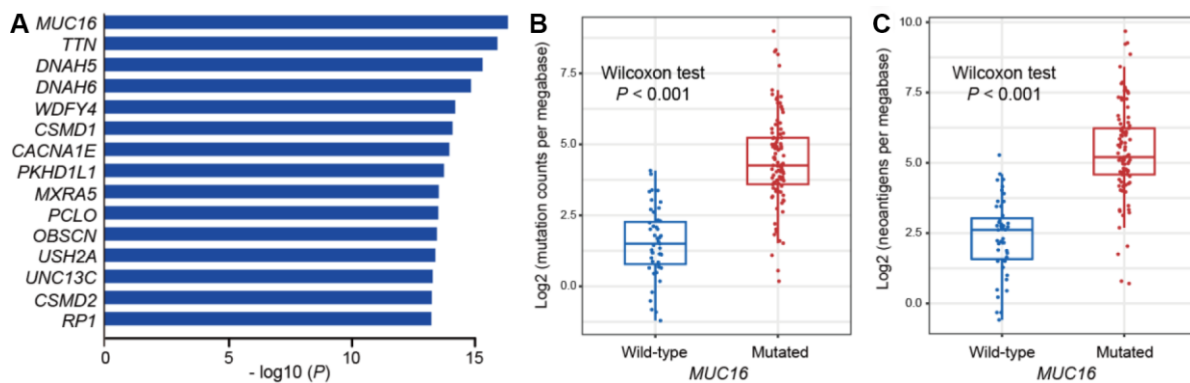

**Supplementary Figure 8. Association of *MUC16* mutation with TML and neoantigen load in the ICI treated cohort. (A)** Top 15 significant association of single gene mutation with TML. **(B)** Association of *MUC16* mutation with TML. **(C)** Association of *MUC16* mutation with neoantigen load.

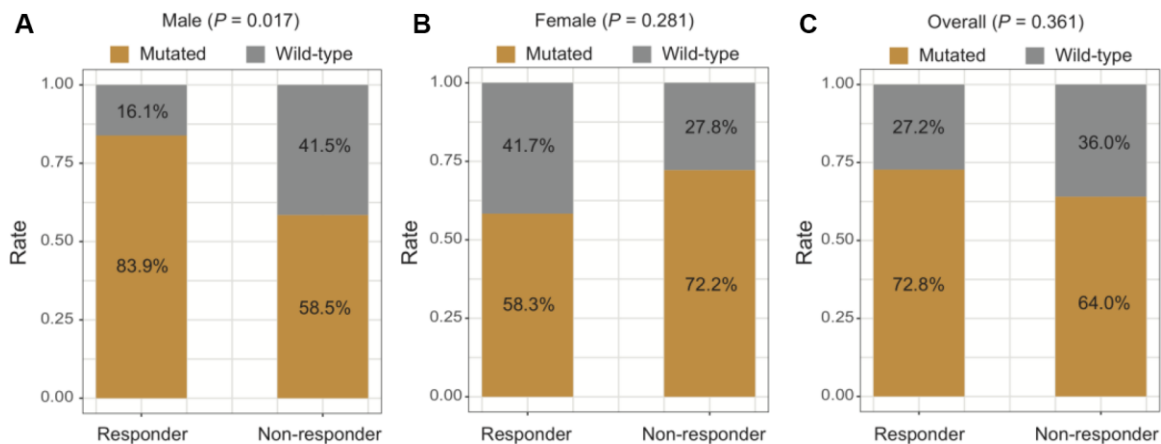

**Supplementary Figure 9. Differences of *MUC16* mutation rate between responders and non-responders in (A) male patients, (B) female patients and (C) overall patients.**
