# Supplementary material for: High mutation load, immune-activated microenvironment, favorable outcome, and better immunotherapeutic efficacy in melanoma patients harboring MUC16/CA125 mutations
Source: publisher site journal article supplement (doi:10.18632/aging.103296), 2020-06-03
Supplement: Supplementary file [file aging-v12i11-103296-supplementary-material-SD2.pdf]

**SUPPLEMENTARY TABLE**

**Supplementary Table 1. Cooccurrent mutation of *MUC16* and DNA repair genes.**

|                | TCGA cohort  |             |                | ICGC cohort  |             |                |
|----------------|--------------|-------------|----------------|--------------|-------------|----------------|
|                | <i>MUC16</i> |             | <i>P</i> value | <i>MUC16</i> |             | <i>P</i> value |
|                | Mutated      | Wild-type   |                | Mutated      | Wild-type   |                |
| <i>TP53</i>    |              |             |                |              |             |                |
| Mutated        | 57 (16.7%)   | 7 (5.6%)    | 0.001          | 27 (20.5%)   | 2 (3.9%)    | 0.006          |
| Wild-type      | 284 (83.3%)  | 119 (94.4%) |                | 105 (70.5%)  | 49 (96.1%)  |                |
| <i>POLE</i>    |              |             |                |              |             |                |
| Mutated        | 44 (12.9%)   | 1 (0.8%)    | < 0.001        | 16 (12.1%)   | 0 (0.0%)    | 0.007          |
| Wild-type      | 297 (87.1%)  | 125 (99.2%) |                | 116 (87.9%)  | 51 (100.0%) |                |
| <i>BRCA1/2</i> |              |             |                |              |             |                |
| Mutated        | 56 (16.4%)   | 5 (4.0%)    | < 0.001        | 26 (19.7%)   | 2 (3.9%)    | 0.006          |
| Wild-type      | 285 (83.6%)  | 121 (96.0%) |                | 106 (80.3%)  | 49 (96.1%)  |                |
| MMR genes      |              |             |                |              |             |                |
| Mutated        | 49 (14.4%)   | 2 (1.6%)    | < 0.001        | 22 (16.7%)   | 0 (0.0%)    | 0.001          |
| Wild-type      | 292 (85.6%)  | 124 (98.4%) |                | 110 (83.3%)  | 51 (100.0%) |                |
